# Supplementary material for: C10H10ClNO3: exploration of birefringent crystals in an isoquinoline system
Source: Royal Society of Chemistry journal article supplement (doi:10.1039/d3qi00320e), 2023-01-01
Supplement: d3qi00320e1.pdf [file d3qi00320e1.pdf]

# Electronic Supplementary Information

## **C<sub>10</sub>H<sub>10</sub>ClNO<sub>3</sub>: Exploration of Birefringent Crystal in Isoquinoline System**

*Hao Chen,<sup>a</sup> Shaobin Zhang,<sup>a</sup> Bo Chen,<sup>a</sup> Yaoguo Shen<sup>\*a</sup> and Junhua Luo<sup>b</sup>*

### Contents

|                                                                                                                                      |     |
|--------------------------------------------------------------------------------------------------------------------------------------|-----|
| Reagents .....                                                                                                                       | S2  |
| Synthesis of C <sub>10</sub> H <sub>10</sub> ClNO <sub>3</sub> ( <b>1</b> ).....                                                     | S2  |
| Single-Crystal Structure Determination.....                                                                                          | S2  |
| Thermal Stability Analysis.....                                                                                                      | S2  |
| UV/Vis/NIR Diffuse Reflectance Spectroscopy.....                                                                                     | S2  |
| Infrared Spectroscopy .....                                                                                                          | S2  |
| Birefringence Measurements .....                                                                                                     | S3  |
| Computational Methods.....                                                                                                           | S3  |
| Fig. S1. Thermal stability analysis for <b>1</b> .....                                                                               | S4  |
| Fig. S2. XRD of <b>1</b> at different temperatures .....                                                                             | S4  |
| Fig. S3. UV-Vis-NIR diffuse reflection spectra of <b>1</b> .....                                                                     | S5  |
| Fig. S4. Infrared spectrum of <b>1</b> . .....                                                                                       | S5  |
| Fig. S5. Electronic band structure of <b>1</b> (GGA). .....                                                                          | S6  |
| Fig. S6. Electronic band structure of <b>1</b> (HSE06). .....                                                                        | S6  |
| Table 1. Crystal Data and Structural Refinement for C <sub>10</sub> H <sub>10</sub> ClNO <sub>3</sub> .....                          | S7  |
| Table 2. Atomic Coordinates and Equivalent Isotropic Displacement Parameters. ....                                                   | S8  |
| Table 3. Anisotropic Displacement Parameters. ....                                                                                   | S9  |
| Table 4. Bond Lengths for C <sub>10</sub> H <sub>10</sub> ClNO <sub>3</sub> .....                                                    | S10 |
| Table 5. Bond Angles for C <sub>10</sub> H <sub>10</sub> ClNO <sub>3</sub> . ....                                                    | S10 |
| Table 6. Hydrogen Bonds for C <sub>10</sub> H <sub>10</sub> ClNO <sub>3</sub> .....                                                  | S10 |
| Table 7. Torsion Angles for C <sub>10</sub> H <sub>10</sub> ClNO <sub>3</sub> .....                                                  | S11 |
| Table 8. Hydrogen Atom Coordinates and Isotropic Displacement Parameters for C <sub>10</sub> H <sub>10</sub> ClNO <sub>3</sub> ..... | S11 |
| References.....                                                                                                                      | S12 |

<sup>a</sup> College of Physics and Electronic Information Engineering, Minjiang University, Fuzhou, Fujian 350108, China. Email: shenyg@mju.edu.cn

<sup>b</sup> State Key Laboratory of Structural Chemistry, Fujian Institute of Research on the Structure of Matter, Chinese Academy of Sciences, Fuzhou, Fujian 350002, China.



## Reagents

C<sub>10</sub>H<sub>7</sub>NO<sub>2</sub> (97%) and HCl (98%) were purchased from Aladdin and used as received.

## Synthesis of C<sub>10</sub>H<sub>10</sub>ClNO<sub>3</sub> (1)

The crystal of **1** was synthesized by a simple solution evaporation technique. Mix C<sub>10</sub>H<sub>7</sub>NO<sub>2</sub> (0.126g, 1mmol) raw material reactant with hydrochloric acid (10 mL) in a glass beaker. The solution was stirred with a magnetic stirrer for 30 minutes to obtain a transparent liquid. The beaker is sealed with perforated plastic packaging and placed at room temperature for about 3 days. The purity of the obtained product was confirmed by powder X-ray diffraction (XRD), which was measured by Rigaku MiniFlex II diffractometer (Cu K $\alpha$  radiation), the range is  $2\theta = 7^{\circ}$ – $70^{\circ}$ , step size  $0.01^{\circ}$ , sampling rate  $1^{\circ} \text{ min}^{-1}$ . The results are consistent with the XRD spectra calculated in the single crystal XRD analysis (Fig. 2a).

## Single-Crystal Structure Determination

A colorless **1** crystal was selected using an optical microscope for single-crystal XRD analysis. The diffraction data were collected at 293(2) K on an XtaLAB Pro II AFC12 equipped with a Hybrid Pixel Array Detector and Rigaku Mo X-ray Source. The collection of the intensity data, cell refinement, and data reduction were carried out with the program CrysAlisPro.<sup>1</sup> Using Olex2,<sup>2</sup> the structure was solved with the olex2.solve<sup>3</sup> structure solution program using Charge Flipping and refined with the SHELXL<sup>4</sup> refinement package using Least Squares minimisation. Details of crystal parameters, data collection, and structure refinement are summarized in Table S1. The atomic coordinates and equivalent isotropic displacement parameters are listed in Table S2, and the anisotropic displacement parameters are listed in Table S3. The selected bond distances and angles are presented in Table S4–S5.

## Thermal Stability Analysis

The thermogravimetric (TG) and differential thermal analysis (DTA) of **1** was carried out on a NETZSCH STA 449C simultaneous analyzer. About 7.5 mg of **1** was placed in Al<sub>2</sub>O<sub>3</sub> crucibles, heated at a rate of  $20^{\circ} \text{ C min}^{-1}$  from room temperature to  $600^{\circ} \text{ C}$  under flowing nitrogen.

## UV-Vis-NIR Diffuse Reflectance Spectroscopy

The UV/Vis/NIR diffuse reflection data were collected on a PerkinElmer Lambda-1050 UV/vis/NIR spectrophotometer. A whiteboard provided by the merchant was used as a reference (100% reflectance) in the range from 220 nm to 800 nm.

## Infrared Spectroscopy

Infrared spectrum was measured on a Nicolet iS50FT-IR spectrometer with KBr pellets as a standard in the range of  $4000\sim 400 \text{ cm}^{-1}$ . The mixture of **1** and dried KBr (mass ratio = 1:100) was ground thoroughly in an agate mortar, and then pressed into a thin slice for measurement.

## Birefringence Measurements

The Birefringence of **1** was obtained through a polarizing microscope (Nikon LV1000) equipped with a Berek compensator at a wavelength of 550 nm. Small crystal was chose for the measurement. The following formula was listed

to calculate birefringence:  $R = |N_e - N_o| = \Delta n \times T$ , where  $R$  denotes the optical path difference,  $\Delta n$  represents birefringence, and  $T$  denotes the thickness of the crystal.

### Computational Methods

The first-principles calculations for **1** were performed by CASTEP<sup>5</sup> on a plane-wave pseudopotential total energy package based density functional theory (DFT).<sup>6</sup> The functional developed by Perdew-Burke-Ernzerhof (PBE) functional within the generalized gradient approximation (GGA)<sup>7-8</sup> form was adopted to describe the exchange-correlation energy. The ultrasoft pseudopotentials were used to model the effective interaction between atom cores and valence electrons. H  $1s^1$ , C  $2s^2 2p^2$ , N  $2s^2 2p^3$ , O  $2s^2 2p^4$  and Cl  $3s^2 3p^5$  electrons were treated as valence electrons. The kinetic energy cutoff of 380 eV and dense  $2 \times 2 \times 1$  Monkhorst-Pack<sup>9</sup> k-point meshes in the Brillouin zones were chosen. The linear optical properties were examined based on the dielectric function  $\epsilon(\omega) = \epsilon_1(\omega) + i\epsilon_2(\omega)$ . The imaginary part of dielectric function  $\epsilon_2$  can be calculated based on the electronic structures and the real part is obtained by the Kramers-Kronig transformation, accordingly the refractive indices and the birefringence ( $\Delta n$ ) can be calculated. The frequency-dependent refractive indices were calculated to demonstrate the validity of birefringence measurements.

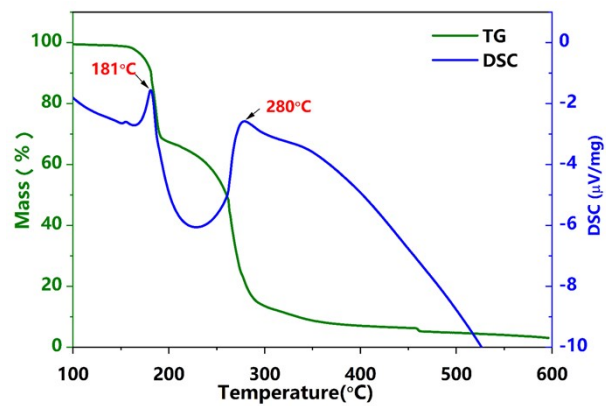

Fig. S1 Thermal stability analysis for 1.

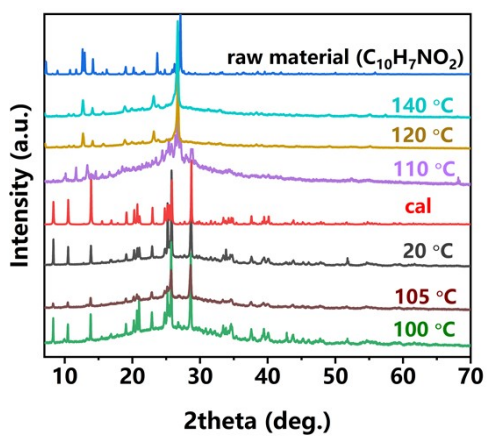

Fig. S2 XRD of 1 at different temperatures.

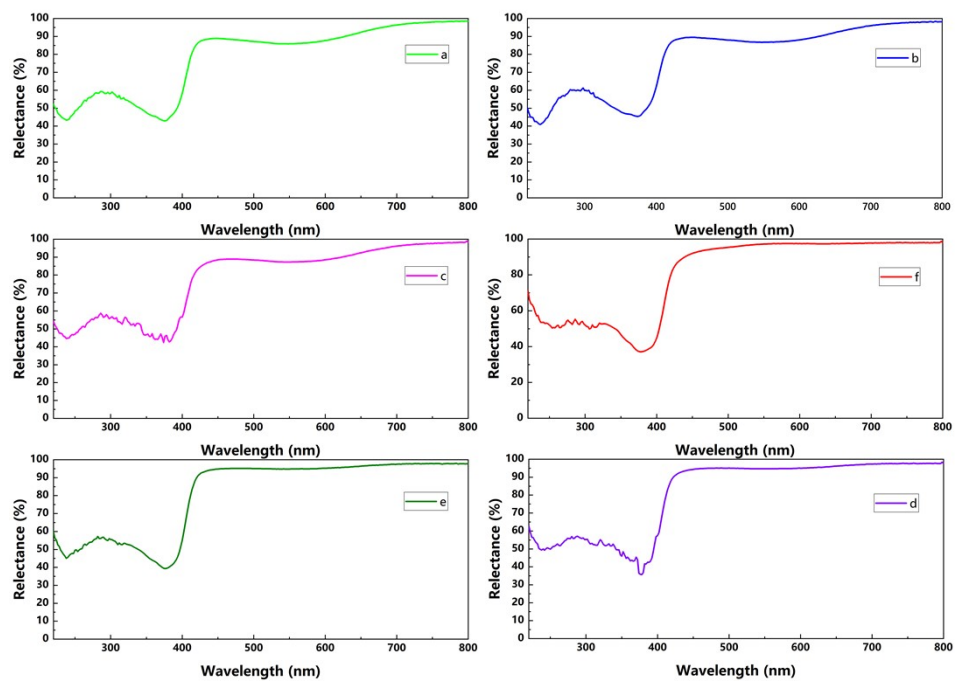

Fig. S3 UV-Vis-NIR diffuse reflection spectra of 1.

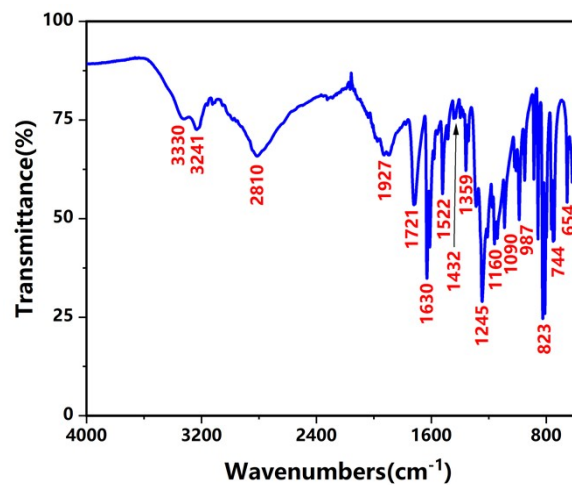

Fig. S4 Infrared spectrum of 1.

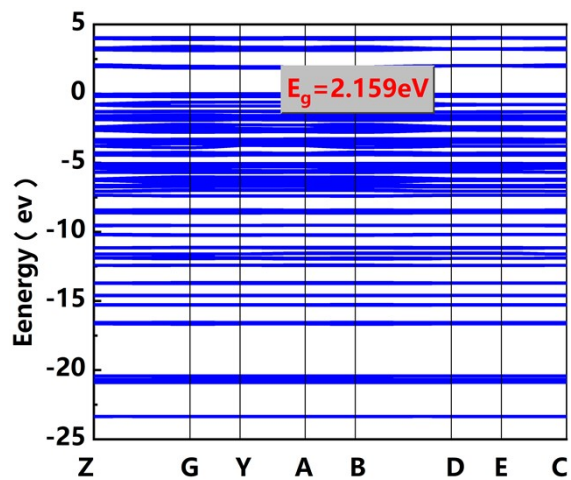

Fig. S5 Electronic band structure of 1 (GGA).

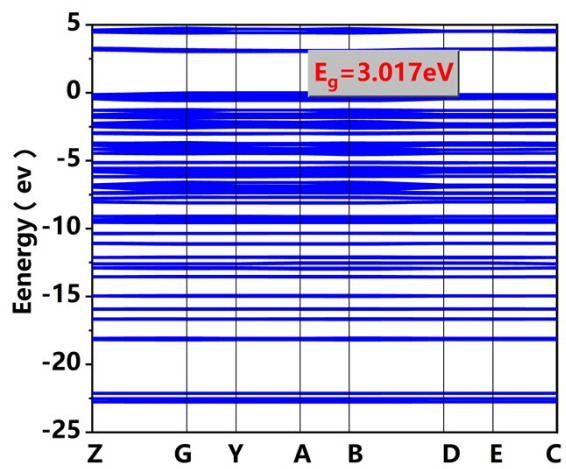

Fig. S6 Electronic band structure of 1 (HSE06).

Table 1. Crystal Data and Structural Refinement for C<sub>10</sub>H<sub>10</sub>ClNO<sub>3</sub>.

| Empirical formula                                            | C <sub>10</sub> H <sub>10</sub> ClNO <sub>3</sub>                            |
|--------------------------------------------------------------|------------------------------------------------------------------------------|
| Formula weight                                               | 227.64                                                                       |
| Temperature/K                                                | 293(2)                                                                       |
| Crystal system                                               | monoclinic                                                                   |
| Space group                                                  | <i>P</i> 2 <sub>1</sub> / <i>c</i>                                           |
| <i>a</i> /Å                                                  | 10.6630(10)                                                                  |
| <i>b</i> /Å                                                  | 13.7778(16)                                                                  |
| <i>c</i> /Å                                                  | 7.2187(8)                                                                    |
| $\alpha$ /°                                                  | 90                                                                           |
| $\beta$ /°                                                   | 96.204(10)                                                                   |
| $\gamma$ /°                                                  | 90                                                                           |
| Volume/Å <sup>3</sup>                                        | 1054.31(19)                                                                  |
| <i>Z</i>                                                     | 4                                                                            |
| $\rho_{\text{calc}}/\text{cm}^3$                             | 1.434                                                                        |
| $\mu/\text{mm}^{-1}$                                         | 0.348                                                                        |
| <i>F</i> (000)                                               | 472.0                                                                        |
| Crystal size/mm <sup>3</sup>                                 | 0.4 × 0.3 × 0.2                                                              |
| Radiation                                                    | Mo K $\alpha$ ( $\lambda$ = 0.71073)                                         |
| 2 $\Theta$ range for data collection/°                       | 3.842 to 54.034                                                              |
| Index ranges                                                 | -13 ≤ <i>h</i> ≤ 12, -12 ≤ <i>k</i> ≤ 17, -9 ≤ <i>l</i> ≤ 9                  |
| Reflections collected                                        | 6769                                                                         |
| Independent reflections                                      | 2185 [ <i>R</i> <sub>int</sub> = 0.0385, <i>R</i> <sub>sigma</sub> = 0.0346] |
| Data/restraints/parameters                                   | 2185/3/148                                                                   |
| Goodness-of-fit on <i>F</i> <sup>2</sup>                     | 1.115                                                                        |
| Final <i>R</i> indexes [ <i>I</i> ≥ 2 $\sigma$ ( <i>I</i> )] | <i>R</i> 1 = 0.0398, <i>wR</i> 2 = 0.1046                                    |
| Final <i>R</i> indexes [all data]                            | <i>R</i> 1 = 0.0515, <i>wR</i> 2 = 0.1124                                    |



**Table 2 Fractional Atomic Coordinates ( $\times 10^4$ ) and Equivalent Isotropic Displacement Parameters ( $\text{\AA}^2 \times 10^3$ ) for  $\text{C}_{10}\text{H}_{10}\text{ClNO}_3$ .  $U_{\text{eq}}$  is defined as 1/3 of the trace of the orthogonalised  $U_{ij}$  tensor.**

| Atom | x          | y          | z          | $U(\text{eq})$ |
|------|------------|------------|------------|----------------|
| Cl1  | 6701.2(4)  | 4156.1(3)  | -2070.8(6) | 51.1(2)        |
| O1   | 3468.6(12) | 3083.3(10) | 1921.2(17) | 58.0(4)        |
| O2   | 5111.4(11) | 3716.1(10) | 3702.5(17) | 54.6(4)        |
| N1   | 3836.2(15) | 4093.2(10) | 6410(2)    | 40.7(4)        |
| C1   | 3159.6(15) | 3797.5(11) | 4855(2)    | 37.0(4)        |
| C2   | 1830.1(15) | 3747.2(11) | 4796(2)    | 40.0(4)        |
| C3   | 1022.3(16) | 3460.2(13) | 3190(3)    | 52.1(5)        |
| C4   | -250.2(18) | 3436.1(15) | 3249(3)    | 62.8(6)        |
| C5   | -787.4(18) | 3681.8(14) | 4870(3)    | 61.3(6)        |
| C6   | -52.2(18)  | 3963.2(14) | 6429(3)    | 55.6(5)        |
| C7   | 1281.2(16) | 4009.7(12) | 6442(3)    | 45.1(4)        |
| C8   | 2067.6(19) | 4311.0(13) | 8018(3)    | 52.6(5)        |
| C9   | 3335.0(18) | 4349.0(13) | 7985(3)    | 49.3(5)        |
| C10  | 3914.3(16) | 3491.1(12) | 3303(2)    | 41.7(4)        |
| O3   | 6655.1(13) | 3032.0(10) | 1642.9(19) | 55.2(4)        |

**Table 3 Anisotropic Displacement Parameters ( $\text{\AA}^2 \times 10^3$ ) for  $\text{C}_{10}\text{H}_{10}\text{ClNO}_3$ . The anisotropic displacement factor exponent takes the form:  $-2\pi^2[h^2a^*U_{11}+2hka^*b^*U_{12}+\dots]$ .**

| Atom | $U_{11}$ | $U_{22}$ | $U_{33}$ | $U_{23}$ | $U_{13}$ | $U_{12}$  |
|------|----------|----------|----------|----------|----------|-----------|
| Cl1  | 51.8(3)  | 56.6(4)  | 44.7(3)  | -4.0(2)  | 4.4(2)   | -3.52(19) |
| O1   | 60.4(8)  | 63.2(9)  | 50.0(8)  | -23.3(6) | 3.5(7)   | -2.6(6)   |
| O2   | 44.6(7)  | 73.4(10) | 46.5(8)  | -14.5(7) | 8.6(6)   | 0.5(6)    |
| N1   | 44.1(8)  | 39.4(9)  | 38.7(8)  | -1.5(6)  | 4.3(7)   | -2.9(6)   |
| C1   | 45.7(9)  | 26.5(9)  | 38.8(9)  | 0.0(7)   | 4.5(7)   | -0.1(6)   |
| C2   | 44.3(9)  | 27.5(9)  | 47.8(10) | 2.1(7)   | 3.6(8)   | -0.5(7)   |
| C3   | 51.1(10) | 43.9(11) | 59.8(12) | -10.9(9) | -0.7(9)  | -0.1(8)   |
| C4   | 49.6(10) | 51.5(13) | 83.9(15) | -9.5(11) | -7.8(11) | -1.9(9)   |
| C5   | 43.1(10) | 47.7(12) | 93.3(17) | 7.7(11)  | 8.7(11)  | -1.4(8)   |
| C6   | 52.1(11) | 48.6(12) | 69.4(14) | 9.3(10)  | 21.8(10) | 2.4(9)    |
| C7   | 49.8(9)  | 33.1(10) | 53.9(11) | 5.3(8)   | 12.2(9)  | 2.3(7)    |
| C8   | 61.4(11) | 55.6(12) | 43.6(11) | 0.4(9)   | 18.1(9)  | 3.8(9)    |
| C9   | 59.5(11) | 53.4(12) | 35.2(10) | -2.3(8)  | 6.3(9)   | -1.8(9)   |
| C10  | 47.9(9)  | 33.7(10) | 43.1(10) | -1.7(8)  | 2.8(8)   | 2.5(7)    |
| O3   | 61.7(8)  | 56.1(9)  | 49.7(8)  | 0.6(7)   | 15.3(7)  | 4.7(7)    |

**Table 4 Bond Lengths for C<sub>10</sub>H<sub>10</sub>CINO<sub>3</sub>.**

| Atom | Atom | Length/Å | Atom | Atom | Length/Å |
|------|------|----------|------|------|----------|
| O1   | C10  | 1.197(2) | C2   | C7   | 1.427(3) |
| O2   | C10  | 1.315(2) | C3   | C4   | 1.362(3) |
| N1   | C1   | 1.331(2) | C4   | C5   | 1.399(3) |
| N1   | C9   | 1.354(2) | C5   | C6   | 1.357(3) |
| C1   | C2   | 1.415(2) | C6   | C7   | 1.422(2) |
| C1   | C10  | 1.509(2) | C7   | C8   | 1.401(3) |
| C2   | C3   | 1.424(2) | C8   | C9   | 1.355(3) |

**Table 5 Bond Angles for C<sub>10</sub>H<sub>10</sub>CINO<sub>3</sub>.**

| Atom | Atom | Atom | Angle/°    | Atom | Atom | Atom | Angle/°    |
|------|------|------|------------|------|------|------|------------|
| C1   | N1   | C9   | 124.09(15) | C5   | C6   | C7   | 120.41(19) |
| N1   | C1   | C2   | 119.36(16) | C6   | C7   | C2   | 118.86(18) |
| N1   | C1   | C10  | 115.34(14) | C8   | C7   | C2   | 119.20(16) |
| C2   | C1   | C10  | 125.22(15) | C8   | C7   | C6   | 121.94(18) |
| C1   | C2   | C3   | 123.64(17) | C9   | C8   | C7   | 120.50(17) |
| C1   | C2   | C7   | 117.53(15) | N1   | C9   | C8   | 119.31(18) |
| C3   | C2   | C7   | 118.83(16) | O1   | C10  | O2   | 125.60(16) |
| C4   | C3   | C2   | 119.89(19) | O1   | C10  | C1   | 123.67(15) |
| C3   | C4   | C5   | 121.3(2)   | O2   | C10  | C1   | 110.72(15) |
| C6   | C5   | C4   | 120.73(18) |      |      |      |            |

**Table 6 Hydrogen Bonds for C<sub>10</sub>H<sub>10</sub>CINO<sub>3</sub>.**

| D  | H  | A  | d(D-H)/Å | d(H-A)/Å | d(D-A)/Å   | D-H-A/° |
|----|----|----|----------|----------|------------|---------|
| O2 | H2 | O3 | 0.82     | 1.71     | 2.5174(18) | 167.6   |

**Table 7 Torsion Angles for C<sub>10</sub>H<sub>10</sub>CINO<sub>3</sub>.**

| A  | B  | C                           | D  | Angle/°     | A   | B  | C  | D   | Angle/°     |
|----|----|-----------------------------|----|-------------|-----|----|----|-----|-------------|
| N1 | C1 | C2                          | C3 | 178.63(15)  | C3  | C2 | C7 | C8  | -178.78(16) |
| N1 | C1 | C2                          | C7 | -0.8(2)     | C3  | C4 | C5 | C6  | 0.8(3)      |
| N1 | C1 | C <sub>0</sub> <sup>1</sup> | O1 | 169.25(16)  | C4  | C5 | C6 | C7  | -0.2(3)     |
| N1 | C1 | C <sub>0</sub> <sup>1</sup> | O2 | -9.5(2)     | C5  | C6 | C7 | C2  | -0.6(3)     |
| C1 | N1 | C9                          | C8 | -0.2(3)     | C5  | C6 | C7 | C8  | 179.02(18)  |
| C1 | C2 | C3                          | C4 | -179.67(18) | C6  | C7 | C8 | C9  | -179.88(18) |
| C1 | C2 | C7                          | C6 | -179.77(15) | C7  | C2 | C3 | C4  | -0.3(3)     |
| C1 | C2 | C7                          | C8 | 0.6(2)      | C7  | C8 | C9 | N1  | 0.1(3)      |
| C2 | C1 | C <sub>0</sub> <sup>1</sup> | O1 | -7.6(3)     | C9  | N1 | C1 | C2  | 0.5(2)      |
| C2 | C1 | C <sub>0</sub> <sup>1</sup> | O2 | 173.66(16)  | C9  | N1 | C1 | C10 | -176.50(15) |
| C2 | C3 | C4                          | C5 | -0.5(3)     | C10 | C1 | C2 | C3  | -4.6(3)     |
| C2 | C7 | C8                          | C9 | -0.3(3)     | C10 | C1 | C2 | C7  | 175.98(15)  |
| C3 | C2 | C7                          | C6 | 0.8(2)      |     |    |    |     |             |

**Table 8 Hydrogen Atom Coordinates (Å×10<sup>4</sup>) and Isotropic Displacement Parameters (Å<sup>2</sup>×10<sup>3</sup>) for C<sub>10</sub>H<sub>10</sub>CINO<sub>3</sub>.**

| Atom | x        | y        | z        | U(eq) |
|------|----------|----------|----------|-------|
| H2   | 5523.49  | 3474.82  | 2924.49  | 82    |
| H1   | 4660(20) | 4052(13) | 6420(30) | 60(6) |
| H3   | 1362.6   | 3289.37  | 2102.47  | 62    |
| H4   | -771.86  | 3252.9   | 2190.27  | 75    |
| H5   | -1658.04 | 3651.78  | 4879.61  | 74    |
| H6   | -422.43  | 4126.72  | 7495.55  | 67    |
| H8   | 1717.19  | 4486.26  | 9094.88  | 63    |
| H9   | 3855.08  | 4548.74  | 9032.91  | 59    |
| H3A  | 6590(20) | 3250(16) | 550(20)  | 83    |
| H3B  | 6650(20) | 2422(11) | 1650(30) | 83    |

## References

- (1) *CrysAlisPro*, Ver. 1.171.36.28; Agilent Technologies: Santa Clara, CA, 2013.
- (2) O. V. Dolomanov, L. J. Bourhis, R. J. Gildea, J. A. K. Howard, H. Puschmann, OLEX2: a complete structure solution, refinement and analysis program, *J. Appl. Cryst.*, 2009, **42**, 339.
- (3) L. J. Bourhis; O. V. Dolomanov, R. J. Gildea, J. A. K. Howard, H. Puschmann, The anatomy of a comprehensive constrained, restrained refinement program for the modern computing environment-Olex2 dissected, *Acta Cryst. A* 2015, **71**, 59.
- (4) G. M. Sheldrick, SHELXT-integrated space-group and crystal-structure determination, *Acta Cryst. C* 2015, **71**, 3.
- (5) S. J. Clark, M. D. Segall, C. J. Pickard, P. J. Hasnip, M. J. Probert, K. Refson, M. C. Payne, First principles methods using CASTEP, *Z. Kristallogr. - Cryst. Mater.*, 2005, **220**, 567.
- (6) M. C. Payne, M. P. Teter, D. C. Allan, T. A. Arias, J. D. Joannopoulos, Iterative minimization techniques for *ab initio* total-energy calculations: molecular dynamics and conjugate gradients, *Rev. Mod. Phys.*, 1992, **64**, 1045.
- (7) D. M. Ceperley, B. J. Alder, Ground-state of the electron-gas by a stochastic method, *Phys. Rev. Lett.*, 1980, **45**, 566.
- (8) J. P. Perdew, A. Zunger, Self-interaction correction to density-functional approximations for many-electron systems, *Phys. Rev. B*, 1981, **23**, 5048.
- (9) H. J. Monkhorst, J. D. Pack, Special points for brillouin-zone integrations, *Phys. Rev. B*, 1976, **13**, 5188.
